# Supplementary material
Source: PubMed Central journal article supplement (PMC8571123)
Supplement: NIHMS1706133-supplement-Supplementary_Material.pdf [file NIHMS1706133-supplement-Supplementary_Material.pdf]

**Supplementary Table 1. Age-standardized participant characteristics of person-years according to average sugar-sweetened beverage intake at age 13-18 among women younger than age 50 in the NHSII, 1998-2015<sup>a</sup>**

| Characteristic                              | Sugar-sweetened beverage intake at age 13-18 |                               |               |
|---------------------------------------------|----------------------------------------------|-------------------------------|---------------|
|                                             | <1 serving/wk                                | 1 serving/wk to <2 servings/d | ≥2 servings/d |
| Person-years, No.                           | 113 475                                      | 218 172                       | 25 788        |
| Age, y                                      | 44.5 (3.9)                                   | 44.6 (3.9)                    | 44.1 (4.1)    |
| Race, white, %                              | 95                                           | 94                            | 94            |
| Height, cm                                  | 165 (6.7)                                    | 165 (6.6)                     | 164 (6.6)     |
| BMI at age 18, kg/m <sup>2</sup>            | 21.6 (3.3)                                   | 20.9 (3.1)                    | 21.0 (3.5)    |
| Ever smokers before age 20, %               | 20                                           | 22                            | 33            |
| Pack-years among ever smokers before age 20 | 2.9 (2.2)                                    | 2.8 (2.1)                     | 3.4 (2.3)     |
| Physical activity at grade 9-12, MET-h/wk   | 52.6 (36.6)                                  | 54.7 (36.2)                   | 57.0 (38.4)   |
| Use of multivitamins at age 13-18, %        | 17                                           | 17                            | 12            |
| Dietary intake in adolescence <sup>b</sup>  |                                              |                               |               |
| Alcohol, g/d                                | 1.3 (4.1)                                    | 1.3 (3.7)                     | 2.1 (5.8)     |
| Red and processed meat, servings/wk         | 1.3 (0.7)                                    | 1.5 (0.7)                     | 1.7 (0.7)     |
| Dietary fiber, g/d                          | 22.6 (6.2)                                   | 20.8 (4.8)                    | 18.3 (4.1)    |
| Total folate, µg/d                          | 369 (140)                                    | 334 (112)                     | 283 (94.7)    |
| Total calcium, mg/d                         | 1160 (375)                                   | 1077 (328)                    | 872 (255)     |

Abbreviations: BMI, body mass index; MET, metabolic equivalent of task; NHSII, Nurses' Health Study II.

<sup>a</sup> Data are presented as mean (standard deviation) of person-years unless otherwise indicated. All values other than age were directly standardized to the age distribution (in 5-year intervals) of all participants.

<sup>b</sup> At age 13-18 other than alcohol intake at age 15-17.

**Supplementary Table 2. Age-standardized participant characteristics at baseline according to average beverage intake in adulthood among women younger than age 50 in the NHSII, 1991-2015<sup>a</sup>**

| Characteristic                                                   | Sugar-sweetened beverages |               | Artificially sweetened beverages |               | Fruit juice   |               |
|------------------------------------------------------------------|---------------------------|---------------|----------------------------------|---------------|---------------|---------------|
|                                                                  | <1 serving/wk             | ≥2 servings/d | <1 serving/wk                    | ≥2 servings/d | <1 serving/wk | ≥2 servings/d |
| N                                                                | 44 769                    | 8740          | 32 777                           | 23 098        | 37 271        | 1431          |
| Age, y                                                           | 37.2 (4.5)                | 35.6 (4.8)    | 36.5 (4.6)                       | 36.5 (4.7)    | 36.9 (4.6)    | 35.4 (4.8)    |
| Race, white, %                                                   | 94                        | 90            | 91                               | 95            | 93            | 88            |
| Height, cm                                                       | 165 (6.6)                 | 165 (6.7)     | 165 (6.7)                        | 165 (6.6)     | 165 (6.6)     | 165 (6.6)     |
| BMI, kg/m <sup>2</sup>                                           | 24.6 (5.0)                | 24.6 (5.9)    | 23.2 (4.7)                       | 25.8 (5.6)    | 24.7 (5.2)    | 23.0 (4.5)    |
| Postmenopausal, %                                                | 3.0                       | 3.9           | 3.0                              | 3.5           | 3.5           | 3.8           |
| Current menopausal hormone use among postmenopausal women, %     | 83                        | 79            | 83                               | 83            | 83            | 74            |
| Family history of colorectal cancer, %                           | 4.3                       | 4.2           | 4.3                              | 4.3           | 4.3           | 4.6           |
| Screening lower endoscopy within the past 10 y, %                | 1.2                       | 1.3           | 1.2                              | 1.2           | 1.2           | 0.9           |
| Lower endoscopy due to other indications within the past 10 y, % | 1.8                       | 2.2           | 1.8                              | 2.0           | 1.8           | 2.0           |
| Ever smokers, %                                                  | 36                        | 36            | 33                               | 37            | 38            | 31            |
| Pack-years among ever smokers                                    | 11.7 (8.4)                | 14.1 (9.9)    | 12.8 (9.1)                       | 12.4 (8.8)    | 12.8 (9.0)    | 10.4 (8.0)    |
| Physical activity, MET-h/wk                                      | 24.6 (28.5)               | 19.7 (26.3)   | 21.3 (26.4)                      | 23.5 (27.6)   | 21.2 (26.2)   | 29.2 (34.1)   |
| Regular use of aspirin, %                                        | 11                        | 13            | 10                               | 13            | 12            | 8.5           |
| Regular use of non-aspirin NSAIDs, %                             | 20                        | 22            | 16                               | 25            | 20            | 18            |
| Current use of multivitamins, %                                  | 44                        | 41            | 46                               | 40            | 38            | 55            |
| Dietary intake                                                   |                           |               |                                  |               |               |               |
| Beverage intake, servings/d                                      | 0.0 (0.0)                 | 4.0 (1.7)     | 0.0 (0.0)                        | 4.6 (2.2)     | 0.1 (0.0)     | 2.8 (0.9)     |
| Alcohol, g/d                                                     | 3.4 (6.3)                 | 2.2 (5.2)     | 2.7 (5.8)                        | 3.5 (6.6)     | 3.1 (6.2)     | 3.0 (6.0)     |
| Red and processed meat, servings/wk                              | 5.7 (4.3)                 | 8.6 (5.1)     | 6.6 (4.8)                        | 7.0 (4.8)     | 6.3 (4.6)     | 6.1 (4.6)     |
| Dietary fiber, g/d                                               | 19.7 (5.9)                | 14.2 (4.0)    | 17.7 (5.8)                       | 18.4 (5.4)    | 18.1 (6.1)    | 18.2 (5.8)    |
| Total folate, µg/d                                               | 502 (302)                 | 386 (240)     | 485 (312)                        | 452 (266)     | 438 (291)     | 584 (285)     |
| Total calcium, mg/d                                              | 1085 (464)                | 794 (346)     | 997 (451)                        | 1016 (426)    | 1004 (467)    | 996 (378)     |
| Alternative Healthy Eating Index-2010 score <sup>b,c</sup>       | 41.8 (9.4)                | 34.9 (8.2)    | 39.5 (9.8)                       | 38.8 (8.9)    | 38.9 (9.5)    | 42.8 (9.8)    |

Abbreviations: BMI, body mass index; MET, metabolic equivalent of task; NHSII, Nurses' Health Study II; NSAID, nonsteroidal anti-inflammatory drug.

<sup>a</sup> Data are presented as mean (standard deviation) of person-years unless otherwise indicated. All values other than age were directly standardized to the age distribution (in 5-year intervals) of all participants.

<sup>b</sup> Without sugar-sweetened beverages and alcohol.

<sup>c</sup> According to the predefined intake criteria for 11 dietary components (e.g. fruits, vegetables, whole grains, nuts and legumes, red and processed meat, sugar-sweetened beverages, sodium, alcohol, polyunsaturated fatty acids, omega-3 fatty acids, and trans fatty acids), a score ranging from 0 to 10 was given to each component, yielding a total score ranging from 0 to 110. A higher score reflects better diet quality.

**Supplementary Table 3. Sweetened beverage intake in adulthood and risk of early-onset colorectal cancer with mutual adjustment for beverages**

| <b>Exposure</b>                          | <b>&lt;1 serving/wk</b> | <b>1 serving/wk to<br/>&lt;1 serving/d</b> | <b>1 serving/d to<br/>&lt;2 servings/d</b> | <b>≥2 servings/d</b> | <b>P<sub>trend</sub><sup>a</sup></b> | <b>Each serving/d<br/>increase</b> |
|------------------------------------------|-------------------------|--------------------------------------------|--------------------------------------------|----------------------|--------------------------------------|------------------------------------|
| <b>Sugar-sweetened beverages</b>         |                         |                                            |                                            |                      |                                      |                                    |
| Person-years                             | 536 446                 | 504 341                                    | 178 886                                    | 138 469              |                                      |                                    |
| No. of cases                             | 45                      | 34                                         | 14                                         | 16                   |                                      |                                    |
| Multivariable RR (95% CI) <sup>b,c</sup> | 1 [Reference]           | 0.91 (0.57-1.48)                           | 1.14 (0.58-2.23)                           | 1.97 (0.96-4.03)     | 0.03                                 | 1.15 (0.97-1.35)                   |
| <b>Artificially sweetened beverages</b>  |                         |                                            |                                            |                      |                                      |                                    |
| Person-years                             | 424 283                 | 321 864                                    | 258 215                                    | 353 780              |                                      |                                    |
| No. of cases                             | 32                      | 33                                         | 19                                         | 25                   |                                      |                                    |
| Multivariable RR (95% CI) <sup>b,c</sup> | 1 [Reference]           | 1.29 (0.78-2.14)                           | 0.96 (0.53-1.74)                           | 0.83 (0.47-1.47)     | 0.24                                 | 0.95 (0.85-1.06)                   |
| <b>Fruit juice</b>                       |                         |                                            |                                            |                      |                                      |                                    |
| Person-years                             | 450 890                 | 799 663                                    | 92 765                                     | 14 825               |                                      |                                    |
| No. of cases                             | 44                      | 59                                         | 5                                          | 1                    |                                      |                                    |
| Multivariable RR (95% CI) <sup>b,c</sup> | 1 [Reference]           | 0.84 (0.55-1.29)                           | 0.74 (0.28-1.98)                           | 1.13 (0.15-8.60)     | 0.63                                 | 1.17 (0.72-1.90)                   |

Abbreviations: CI, confidence interval; RR, relative risk.

One beverage serving is 8 oz.

<sup>a</sup> Calculated using the median of each category of beverage intake as a continuous variable.

<sup>b</sup> Covariates listed in the footnote of Table 2 were included in the model: race (white, nonwhite), height (continuous), body mass index (continuous), menopausal status and menopausal hormone use (premenopausal, postmenopausal never user, postmenopausal ever user, unknown menopausal status or hormone use), family history of colorectal cancer (yes, no), pack-years of smoking (continuous), physical activity (continuous), regular use of aspirin (yes, no), regular use of nonsteroidal anti-inflammatory drugs (yes, no), current use of multivitamins (yes, no), intake of alcohol, red and processed meat, dietary fiber, total folate [from foods and supplements], and total calcium (all continuous), Alternative Healthy Eating Index-2010 score without sugar-sweetened beverages and alcohol (continuous), and lower endoscopy due to screening (yes, no) or for other indications within the past 10 years (yes, no).

<sup>c</sup> Additionally adjusted for consumption of the other two beverages, depending on the main exposure (continuous).

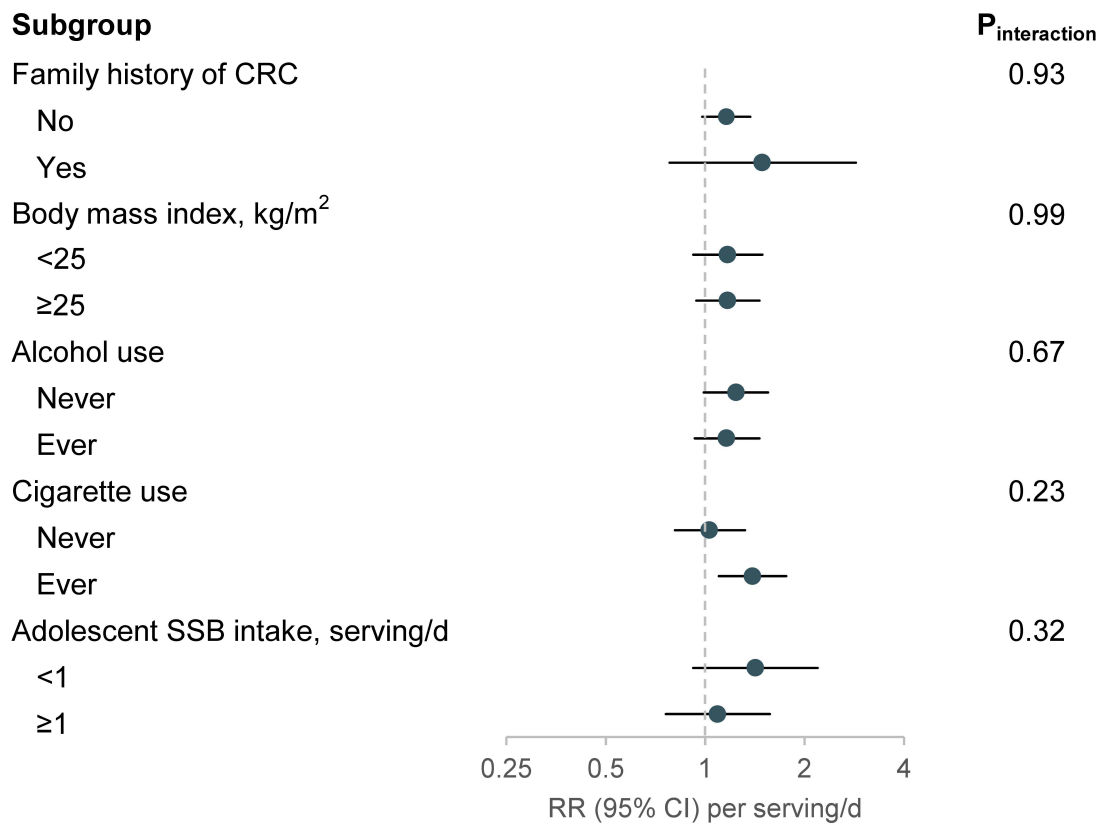

**Supplementary Figure 1. Sugar-sweetened beverage intake in adulthood and risk of early-onset colorectal cancer according to participant characteristics**

Abbreviations: CI, confidence interval; CRC, colorectal cancer; RR, relative risk; SSB, sugar-sweetened beverage. One beverage serving is 8 oz. The models were adjusted for covariates listed in the footnote of Table 2, except family history of CRC in the corresponding stratified model, alcohol intake among never drinkers, and pack-years of smoking among never smokers.
